# Supplementary material
Source: Research Square preprint supplement (doi:10.21203/rs.3.rs-9066930/v1)
Supplement: Supplementary file 1 [file 59e12d8db39bdd87f4a1961b.docx]

**Appendix A:** Figure 1. Pedagogical Class Scenario Inventory


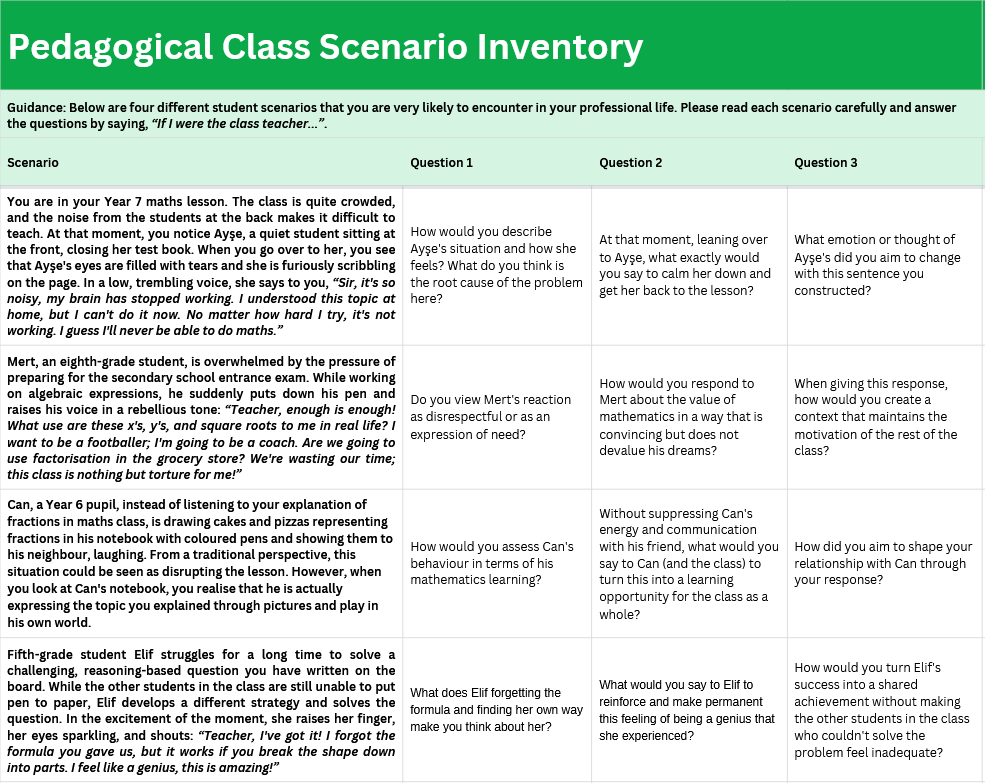


**Appendix-B:** Table 4. MWB x WBL Integration Matrix (MWBL Matrix)

| MWB dimension | WBL component | | | | |
| --- | --- | --- | --- | --- | --- |
|  | Vocabulary and knowledge about WB | Comprehension | Composition | Context awareness | Intentionality |
| Positive emotions | Anxiety, panic, cognitive load, and learned helplessness terms | Understanding the root cause of the crisis as emotional turbulence rather than a lack of talent | Normalisation: *“What you are feeling is perfectly normal; everyone experiences it.”* | Physical environment: Being aware of the oppressive effects of noise and crowds. | Emotion regulation: Reducing and calming the student's current high anxiety |
| Relationship | Teacher-student bond, trust, sense of belonging | Distinguishing rebellion from a call for help as disrespectful | Inclusivity: *“I am here.” “My only daughter.”, “We will manage together.”* | Power balance: Positioning teacher authority as protective rather than punitive | Building trust: Ensuring that the student does not feel alone and trusts the teacher |
| Engagement | Active participation, visual/auditory learning styles | Drawing is not a distraction from the lesson, but an active form of participation in reading | Invitation: *“Tell us too”, “Come to the board and show us.”* | Educational flexibility: Converting an individual method (drawing) into an activity for the whole class | Retention in the system: Keeping the student in the lesson without excluding them |
| Perseverance | Perseverance, perseverance, effort, process | Identifying Ayşe's renunciation not as an end, but as a turning point | Encouragement: *“If not now, you can do it at home”, “Let us try again.”* | Timing: Taking a break and trying again later rather than persisting during a crisis | Attribution change: Increasing resilience by attributing failure to circumstances rather than intelligence |
| Learning environment | Noise pollution, classroom management, and peer pressure | Viewing the environment not only as a physical barrier but also as a psychological one | *Moral language: “Do not infringe on your friend's rights”, “Let us be quiet.”* | System responsibility: Seeing the source of the problem not in the student, but in the unmanageable environment | Ensuring justice: Protecting the rights of students working within the class and maintaining order |
| Cognition | Metacognition, cognitive schema, and reasoning | Viewing Elif's success as conceptual understanding rather than rote memorisation | Thinking language: *“You thought like a mathematician”, “You grasped the logic.”* | Cognitive level: Distinguishing between formula (operational) and logic (conceptual) | Mindset shift: Changing the perception of success from being results-oriented to process-oriented |
| Passion for learning | Inner motivation, curiosity, the joy of discovery | Noticing Mert's weariness or Elif's excitement at discovery | Inspiration: *“The greatest discoveries begin with curiosity”, “I found it moment.”* | Academic burnout: Accepting exam year fatigue | Stimulating curiosity: Maintaining the student's interest in the lesson without turning it into aversion. |
| Supportive actions | Gamification, concretization, and visualization | Accepting Can's pizzas not as mischief but as supportive material | Approval: *“A splendid feast”, “Creative models.”* | Instrumentality: Instrumentalising non-standard actions (art/drawing) for mathematics learning | Legitimisation: Allowing and valuing the student's own method |
| Accomplishment | Self-efficacy, sense of achievement, collective success | Viewing success not as individual stardom but as the collective capital of the class | Sharing: *“We solved it as a class”, “We can all do it.”* | Competition management: Preventing one person's success from creating a feeling of inadequacy in others | Collective competence: We are a successful class in identity building |
| Connection | Interdisciplinary connection, career, and real life | Coding mathematics as an exam obstacle (negative) or a tool for life (positive) | Metaphor: *“Mental muscle”, “Coordinate field”, “Key.”* | Sociological reality: Considering the reality of the secondary school entrance exam or the student's career aspirations | Meaning making: Providing a satisfactory answer to the student's question, *“Why am I learning this?”* |
