# Supplementary material
Source: Research Square preprint supplement (doi:10.21203/rs.3.rs-9066930/v1)
Supplement: Supplementary file 2 [file e6b01d0d02a158f3327a3c2a.xlsx]

## Sheet: Sayfa1
Grade	Participant	Gender	GPA	University	High School	Rate how good you feel about studying mathematics at your university age right now, on a scale of 5.	1. How would you describe Ayşe's situation and how she feels? What do you think is the root cause of the problem here?		2. At that moment, learning over to Ayşe, what exactly would you stay to calm her down and get her back to the lesson?	3. What emotion or thought of Ayşe's did you aim to change with this sentence you constructed?	1. Do you view Mert's reaction as disrespectful or as an expression of read?	2. How would you respond to Mert about the value of mathematics in a way that is convincing but does not devalue hid reams?	3. When giving this response, how would you create a context that maintains the motivation of the rest of the class?	1. How would you assess Can's behaviour in terms of his mathematics learning?	2. Without supressing Can's energy and communication with his friend, what would you say to Can (and the class) to turn this into a learning opportunity for the class as a whole?	3. How did you aim to shape your relationship with Can through your response?	1. What does Elif forgetting the formula and finding her own way make you think about her?	2. What would you say to Elif to reinforce and make permanent this feeling of being a geniues that she experienced?	3. How would you turn Elif's success into a shared achievement without making the other students in the class who couldn't solve the problem feel inadequate?
4	P1	Girl	3.25	Gazi University	Anatolian High School	4	Ayşe is anxious and panicking about this. She's developing a prejudice against mathematics because she can't solve problems she could calmly solve under the stress and pressure she's created for herself.	The problem here is that the classes are too crowded and the children are uninterested in the lesson.	I would explain to Ayşe that the reason she feels this way is the noise in the classroom, tell her to move away from that for now and focus on the lesson, and if she still doesn't understand, I would reassure her by saying, "Let's look at it together during recess."	The important thing is to break down their prejudice against mathematics. Because the main obstacle to learning mathematics is their prejudice and lack of curiosity towards the subject. If we change this attitude, they will realize that they can do mathematics and will love it.	I certainly don't see this as disrespectful. It's an expression of need because children tend to view math topics as empty and unnecessary unless they are related to real life.	I explain that mathematics shouldn't be thought of solely as calculations or operations. Then I point out that mathematics contributes to our rational thinking and enhances our ability to interpret things in real life. I explain that a football field is a rectangle, and the angle at which a player kicks the ball determines the speed and probability of a goal. I say that all of this is calculated …	If the rest of the class agrees, I'll connect their similar desires to mathematics and tell them we need to continue with this topic.	This behavior immediately reminded me of the types of learning we learned in our education classes. Every child has a different intelligence and a different learning style. If Can can learn better when he visually symbolizes what he hears, that's not wrong; it's a new perspective.	I invite Can to the board and ask him to demonstrate this to the whole class. Then I ask the class, "Did you understand it better with this method?" and I explain that mathematics was actually discovered this way, that scientists didn't discover mathematics overnight. I say, "I think you are children who can contribute to mathematics in the future by finding different solution methods." I think t…	Instead of scolding him, I managed to get him to participate more in class.	Elif's problem-solving steps and strategies have developed. She believes that every problem has a solution when faced with difficulties.	Similarly, mathematics was discovered by scientists through trial and error. Furthermore, the mathematics we use today was once unknown, but as time passed and technology advanced, mathematics also developed and progressed.	I emphasize that the other students haven't tried any of the questions, then I ask them to try a simpler question and see if they can solve it. When they solve the question, they will feel good about it too.
4	P2	Boy	3.14	Düzce University	Science High School	3	Ayşe is a child who studies early for the exam and strives to achieve something, so it's very normal for her to be affected by this. Most likely, she's afraid that her efforts will be in vain, that she won't reach the place her family and she want, and that she won't succeed.	I think the root of the problem is the environment and the confusion he's experiencing because of this tension.	Ayşe, think of it this way: while you're taking the exam, there's construction going on outside. To be successful in every sense, we must try to learn how to progress even in different situations. The reason for my point is already in the sentence.	My goal was for Ayşe to learn that we need to explain the obstacles we face in order to succeed, so that she would have both a reason to keep going and a different perspective.	It's more logical to interpret it as an expression of need. Mert is actually rebelling not against the content of the lesson, but against the pressure and uncertainty surrounding the LGS (High School Entrance Exam). The question, "How will this benefit me?" usually means, "I'm struggling a lot right now and I want to know if it's worth the effort." If we consider it disrespectful, we'll discourag…	Mert, thank you for your honesty. Your dream of becoming a football player and coach is wonderful, especially since modern football is now entirely based on mathematics. When you become a coach, you will actually be using this analytical thinking skill when analyzing your players' data, calculating the 'angles' on the field, or deciphering the 'probabilities' in your opponent's game plan. The x's…	When responding to Mert, a shared contextual goal should be established to involve the rest of the class in the process. Other students are also engaged in similar inquiries. This approach instills the awareness that the course is not just a test requirement, but a problem-solving skill they will use throughout their lives. Class motivation increases when they understand "why" the information is …	I see Can's behavior as a very positive and creative learning strategy. Because Can creates his own schema by visualizing an abstract concept like fractions with everyday objects like cake and pizza. Instead of just listening in the classic way, he ensures lasting learning by encoding the information with pictures. Sharing it with his friend shows that he reinforced the subject through social int…	I could go over to Can and, looking at his drawings with interest, say: "Can, these pizzas and cakes you've drawn perfectly illustrate fractions. In fact, how can we show the operation I'm explaining on the board right now using your colorful models? Come on, let's show this beautiful visualization to your friends and solve an example together using your models."	With this approach, I aim to build a relationship of trust and support with Can. Instead of scolding him, showing him that I recognize his talent will make him feel valued and understood. It will help him see his teacher not as an obstacle, but as a guide accompanying him on his learning journey. In this way, he will perceive any warnings I give in the future not as "pressure," but as "guidance f…	Elif's decision to develop her own strategy instead of relying on formulas demonstrates her high-level thinking skills and strong mathematical intuition. Formulas can be forgotten, but knowledge gained through logical reasoning is lasting. Elif not only solved the problem but also grasped the logic behind it, progressing from the part to the whole. This proves that she possesses a creative and fl…	I would respond to Elif as follows: Elif, the feeling you're experiencing is exactly what a true scientist or mathematician feels when they make a discovery. Anyone can memorize the formula, but building a new path by breaking down the shape into its constituent parts, as you did, is the work of true genius. Never lose this creative perspective, because mathematics is precisely this journey of di…	To share this success without undermining class motivation, I would create the following context: "Friends, Elif showed us something very valuable today. There is no single right way in mathematics, and sometimes forgetting formulas allows our brains to find new and more creative ways. Now, let's all examine Elif's wonderful method together. Let's see who else can reach the same result using diff…
4	P3	Boy	3.14	Düzce University	Anatolian High School	3	I say normal	Noisy	I'll quiet the class first, then I'll tell him to calm down.	.	Need	I would say, follow your dreams, especially now that education is so undervalued. Definitely pursue your dreams, but listen carefully in class and be respectful; this will always give you an advantage.	I'd say everyone should pursue their dreams; after all, happiness is what matters in life, money and all that only goes so far.	I'd say "Well done!" and post it on the classroom bulletin board.	It's possible, as long as it doesn't bother other students, there's no problem once they understand it.	Sincere and affectionate	I would be happy	To continue being inquisitive	I think that if he found it by being inquisitive, you can too.
4	P4	Boy	3.40	Gazi University	Anatolian High School	3	Feeling: Intense feelings of helplessness, inadequacy, and anxiety. Why? Ayşe is unable to recall a topic that she has cognitively integrated into her schemas (at home) due to external stimuli (noise) in the classroom. Her frantic scribbling on the questions is an expression of the intense frustration she is experiencing. Although Ayşe attributes her failure not to a lack of knowledge of the subj…	Origin: Deterioration of the classroom climate and noise pollution. Why? The 7th grade level is a critical period for the transition from abstract thinking to concrete steps and the shaping of academic self-perception. In a noisy environment, a student's "working memory" is overloaded. Ayşe is experiencing a mental block because she cannot focus her attention on the question due to the noise. The…	The Sentence to be Said: "Ayşe, I can see how much you're struggling because of the noise right now, that's perfectly natural. Saying 'my brain has stopped working' is actually a sign that your mind just needs a little silence. The information you understood at home is still there, it's just that the current noise is preventing you from accessing it. Now, let's take a deep breath, put your pen do…	The goal is to shift Ayşe's fixed mindset of "I'll never be able to do math" back to a growth mindset by attributing failure to external factors. Targeted Change: Breaking learned helplessness and repairing her perception of academic self-efficacy. Why? Ayşe is confusing a temporary "noise-induced focus problem" with a permanent "lack of mathematical ability." The sentence posed dispels this misc…	Mert's outburst should absolutely not be seen as disrespect, but rather as a "cry for help" and a need for understanding. Analysis: Eighth-grade students are between Piaget's abstract operations stage and Erikson's role confusion stage versus identity formation. Under the pressure of a high-stakes exam like the LGS (High School Entrance Exam), Mert feels that the abstract knowledge he has learned…	The Sentence to be Said: "Mert, it's very valuable that you have goals and want to progress in a disciplined field like football. When you become a coach, you'll be managing not only physical strength on the field, but actually 'strategic mathematics.' The factorization or algebraic expressions we're doing today are actually training your brain; they improve your ability to break down a complex g…	I generalize the answer given to Mert to the whole class, framing the topic within the context of "lifelong learning" and "mental flexibility." Strategy: Turning to the class, I say, "Friends, Mert made a very valid point. You all have different dreams: some of you will be artists, some engineers, some athletes. However, the purpose of school is not just to make you memorize formulas, but to teac…	Can's behavior should be evaluated not as classic indiscipline, but rather as an "individualized effort at concretization and meaning-making." Assessment: From the perspective of Howard Gardner's Theory of Multiple Intelligences, this situation shows that Can's Visual-Spatial Intelligence is dominant. Can concretizes the abstract concept of fractions, presented verbally by the teacher, by visuali…	The Sentence to be Said: "Can, I looked at your drawings and I loved how appetizingly you modeled fractions! You're actually explaining the concepts of 'quarter' and 'half' that we're discussing to your friend with a fantastic visual. Now, I have a request: Would you share these delicious pizzas and cakes with us on the board? Let's see how you solve a problem as a class using your creative model…	This response aims to build an unconditional acceptance and supportive trust relationship between Can and his teacher. Targeted Relationship Style: A guidance-focused and sensitive teacher-student bond that respects the student's individuality. Why? When Can receives approval from his teacher in an area he is interested in (art), he will develop a positive attitude towards mathematics as well. Wh…	Elif's behavior demonstrates that she engaged in "meaningful learning" rather than "rote learning," and possesses a high level of analytical thinking skills. Analysis: When Elif couldn't find readily available information (algorithmic solution) like a formula, instead of giving up, she constructed a new solution by breaking down the problem into its basic components (like deconstructing a geometr…	The Sentence to be Said: "You did a fantastic job, Elif! You acted like a true mathematician. Because mathematics isn't just about remembering formulas; it's about breaking down a complex problem into smaller parts and discovering new ways, as you did. Forgetting the formula actually turned into a great opportunity for you; because finding your own method showed you how powerful and creative your…	Strategy: I invite Elif to the board and have her explain the method not as a "formula," but as a "strategy sharing" session. I address the class: "Friends, Elif reminded us of something very important today. Sometimes when paths are blocked (when we forget the formula), we can chart our own new paths. Now, let's all examine Elif's 'decomposition' method together. Who can think of another similar…
4	P5	Girl	3.08	Gazi University	Anatolian High School	5	Ayşe's situation can be described as performance anxiety and emotional distress due to cognitive overload. The primary emotions she feels are anxiety, helplessness, and inadequacy. The reason: The noise distracted Ayşe and depleted her mental resources. Her inability to answer questions in class that she could normally do at home led to negative self-talk such as, "I can't do it." This situation …	The root of the problem is a combination of environmental factors (noise) and the student's sensory sensitivity. Reason: Ayşe is a quiet student who learns by paying attention to the lesson. The crowded classroom environment and noise from the back rows made it difficult for Ayşe to concentrate. This situation has created a problem not in the student's learning capacity, but in the quality of the…	“Ayşe, it’s perfectly normal to be struggling right now. Everyone gets confused when there’s noise. Since you were able to do this at home, you know how to handle it. Now, let’s step away from the test for a minute, take a deep breath. Let’s look at just one question together, the rest will come later.” Reason: With this sentence, I’m normalizing Ayşe’s situation, showing that I understand her wi…	With this sentence, I aimed to transform Ayşe's thought, "I can't do math," into "I'm struggling right now, but I can do it." Reason: Ayşe's problem isn't mathematical proficiency, but a loss of self-confidence. It's necessary to stop the student's negative generalization (I'll never be able to do it) and help them see the situation as a temporary difficulty. This reduces anxiety, rebuilds self-c…	I see Mert's reaction not as disrespect, but as an expression of a need that arose under intense pressure. Reason: The LGS (High School Entrance Exam) process created stress and a feeling of meaninglessness in Mert. His reaction is not to the lesson itself, but to the question, "Why am I doing this?" This shows that the student needs emotional support and a sense of purpose.	“Mert, your dream of becoming a football player is very valuable. Math won't make you a football player, but it can make you a good coach. Reading the timing, statistics, and tactics correctly in training is done with mathematics. What you learn here isn't just for the exam, it's for making the right decisions.” Reason: This answer connects mathematics to life without belittling Mert's dream and …	"Friends, we may all have different goals, but this lesson teaches us to think critically on the path to achieving those goals." Reason: This context emphasizes that mathematics is a common skill for everyone in the class, without single-mindedly highlighting any one student, thus maintaining overall motivation.	I would interpret Can's behavior not as disengagement from the lesson, but as visual and game-based learning. Reason: Can makes sense of fractions by concretizing them with pictures instead of abstract symbols. This shows that he is actively processing the subject in his mind and adding his own way to learning.	“Can, the pizzas you drew are very nice. Now let's show one to the class: Can you tell us what percentage of it is colored? Let's all look at it together.” Reason: This statement directs Can's energy towards the lesson without suppressing it, and at the same time, it creates a collaborative learning environment by involving the class in the process.	With this response, I aim to establish a trusting, supportive, and learning-encouraging relationship with Can. Reason: If a student feels understood instead of being punished, they will be more open to learning and their participation in the lesson will increase.	This suggests that Elif possesses advanced thinking skills, problem-solving flexibility, and creative reasoning abilities. Reason: Instead of memorizing the formula, her ability to create her own strategy shows that she understands and uses information, and that she has developed mathematical thinking skills.	“Elif, what you did today is the essence of mathematics. The formula may have slipped your mind, but your thinking worked. That’s why you arrived at the correct result.” Reason: This statement builds lasting self-confidence by linking success to effort and thought processes, rather than intelligence.	"Friends, the method Elif found shows us that there can be more than one solution to the same problem. Now let's examine this method together." Reason: This approach transforms the solution process into a model that everyone can learn from, without glorifying Elif, and maintains the motivation of other students.
4	P6	Boy	3.01	Gazi University	İmam Hatip Lisesi	4	Ayşe is not suited to studying in a noisy environment.	Because there is no order in the classroom	Ayşe, you are a very smart girl, I have faith in you. You can't do it right now because of your class, but keep trying, you will succeed!	The thought that he couldn't do the lesson	I use the word "necessary" because Mert is still young and doesn't know where to use what in mathematics.	Mert, these are also useful in our daily lives. For example, we use the 'x' symbols instead of fruit, pencils, and erasers. Think of it that way.	I will give an explanation to the general class.	Can might have hyperactivity disorder, which could be why he's drawing a picture and showing it to a friend.	I would say, "I'm going to call one of you up for the next question," and everyone would focus on the question, saying, "You can be yourself."	I made an impact on the general class here in Çan, but it got lost in the shuffle.	Elif is a practical person.	Well done, my genius Elif!	Friends, we can all do this, but we need to make the effort.
4	P7	Girl	3.18	Gazi University	Science High School	3	I would describe Ayşe's situation and feelings as "a momentary learning block triggered by academic anxiety." It's not an inability to do math, but a temporary mental block caused by anxiety under intense stimulation.	The root of the problem in this situation is not Ayşe's mathematical knowledge or study habits; it's performance anxiety triggered by environmental stress and the accompanying attentional/sensory sensitivity.	Ayşe, what you're experiencing right now isn't a lack of math knowledge; it's brain fatigue from the noise. This is perfectly normal. Since you can do it at home, you know the subject. Now, all I want from you is this: Put down your pen, take a deep breath. You don't have to solve a question right now. We'll look at just one question together in a moment, not all of them. Instead of saying "I can…	Ayşe interprets the momentary difficulty she experiences as a permanent inadequacy. This is a cognitive distortion (generalization and labeling) very common in 7th-grade students. The word "never" creates hopelessness. Hopelessness stops the attempt. If the attempt stops, learning also stops. That's why I specifically emphasized "this isn't about not knowing math," "right now," and "since you can…	I see Mert's reaction not as disrespect, but as a strong expression of need. LGS (High School Entrance Exam) preparation creates emotional outbursts in students due to time pressure, comparison, and anxiety about the future. This outburst sometimes manifests as angry language. Yes, raising his voice is unacceptable in terms of classroom order. However, the important pedagogical distinction is thi…	Without getting into an argument in the middle of the class, I would respond to Mert in a lowered voice but with a clear stance like this: Mert, your desire to become a football player is a very valuable and serious dream. I truly respect that. But let me tell you honestly: Mathematics isn't there to make you a football player, but so that when you become one, you won't be fooled, you'll make the…	Immediately after responding to Mert, I turn my gaze to the class and create a context similar to this: “Actually, the question Mert asked isn't just his; it's crossed all of your minds at least once. The question, ‘Where will this topic stand in my life?’ is a very real question.”5-+-@+-!Then I create this framework: “In this class, there are those who want to be doctors, designers, and athletes…	I would not view Can's behavior as a negative "skipping class" in terms of mathematics learning, but rather as an alternative learning strategy where learning takes place in a visual and game-based way. Can's behavior of decorating his notebook and drawing pictures: Is not a break from mathematics It is a process of reconstructing mathematics in his own world What is important in education is not…	“Can, your drawings are beautiful; I see you're really trying to understand fractions. I'll ask you to share them with everyone in a minute. Now, whisper to your friend and choose one, and we'll look at it together in a moment.” Why do I say this? I approve of the behavior, preserving the motivation to learn. I set boundaries, preventing noise and lack of control. I channel the energy into the le…	With this response, I aimed to shape my relationship with Can not as a "student who makes mistakes - teacher who corrects them" relationship, but as a "learning partner - mentor teacher" relationship. Why? To make Can feel that his learning path is seen and valued, To show that I am directing his energy in the right direction instead of suppressing it, To create the feeling that "He understands m…	She seems like a smart and confident student. It's great that she finds her own way and expresses herself.	Yes, Elif, what you did was truly brilliant. Actually, everyone in this class is a genius; discovering new ways is wonderful. The reason I approached it this way is to instill in Elif and the others in the class the feeling that achieving something is truly amazing.	Yes, friends, we can all discover new paths like Elif. The fact that Elif discovered this path today means that we can all make discoveries.
4	P8	Boy	2.45	Gazi University	Science High School	2	He feels disappointed and angry. Because he failed and his right to listen to the lecture was sabotaged.	Distraction	I understand you're upset, but there are many things I can't do either. If we could do everything, what would we be doing in school? :) Besides, it's normal to have trouble focusing on something you know you can do, especially on the first try or in distracting situations. Let's try again!	My goal was to prevent her from feeling like a failure and to help her regulate her emotions (sadness, anger, disappointment). (Of course, there are other students in the back rows who need to be talked to besides Ayşe in this scenario!)	He speaks to his teacher in an inappropriate tone and manner, but it's clear that he's struggling with a subject he can't resolve internally and can't cope with on his own: mathematics. Therefore, I believe his behavior stems from necessity.	You have a wonderful dream. I hope you achieve your goals on this path. But do you think there's no mathematics in football? The dimensions of the field, the angle at which you shoot the ball to score, even the match duration, your nutrition and training schedule based on the energy you need during the match—it's all mathematics. Mathematics was born out of necessity!	I would ask a few more people what they want to be in order to show them that mathematics is used in those fields as well. For example, it's easy to make this connection for an engineer or a pharmacist, but I could also say that even a musician uses mathematics for rhythm, for instance, Mozart used mathematics in his compositions.	Can probably has a visual learning style rather than an auditory one. We try to plan the lesson to encompass all learning styles, but to engage Can, we can add extra visual aids and tangible materials.	I could give her a lesson on how she could tell her friends about what she did. (The lesson might be too long, but around 15-20 minutes would be fine.) This way, we can prepare the lesson in her own style and also respond to her desire to be seen. Of course, it's also very important that the teacher guides the lesson by asking appropriate questions and making additions or corrections.	Instead of getting angry at her or implying that she wasn't paying attention, I aimed to improve our relationship through a more positive approach, making her feel seen and appreciated. I know that students liking their teacher has a significant impact on their academic success.	I congratulate him on that. Formulas can be forgotten, methods can be confused. What matters is understanding the "logic" of the problem and thinking about what can be done.	I would encourage them to find different solutions. I would give examples from the history of mathematics, explaining how many famous mathematicians spent long periods of time trying to solve a problem and eventually arrived at their own solution. I would even use small paradox examples to engage them in the lesson and encourage them to discuss their ideas, such as the barber paradox or "This sen…	I would then say, "Let's all hear from Elif," and have her explain the solution to her classmates on the board. After that, I would show my own solution and any other solutions that come to mind, and then I would pose another question to the class that includes the same learning objective, aiming to show them that they can solve it too.
4	P9	Boy	2.8	Gazi University	Science High School	4	I think the student feels anxious because I've observed that students' anxiety increases when they don't understand math. I think Ayşe couldn't focus and became anxious.	I think the root of the problem is anxiety. Ayşe couldn't focus because of the noise, and that's why her anxiety level increased.	Ayşe, calm down, I can explain it to you. Let's look at it again during recess. Sometimes there are things we don't understand.	I tried to calm him down because with that anger, the child's perception would become even more clouded.	I see it as a necessity; it's normal for teenagers to react this way.	I tell him I support his dream, but that it's a bit of a distant goal right now. I suggest he aim to go to a good university as a closer objective. I suggest we work together to create a positive narrative, explaining that a good university will provide him with a network, allowing him to become a much more well-known and recognized coach.	Actually, this sentence I'm about to say will increase the motivation of the whole class. In truth, I think that if I guide the students by setting small goals and then big goals, they will maintain their motivation better.	I think it's positive; at least the child is interested in the lesson. If I guide him in different ways, I can draw him into the lesson.	I would have Can call the board and ask him to draw his drawings on it as well. I would ask him to draw on the board with red, blue, and black pens. Then, together with all his classmates, I would explain fractions using the drawings, thus involving all the students in the lesson.	I think this reaction will make Can love me more, accept me more, and consequently, our relationship will improve.	This makes me very happy, honestly, because in mathematics there isn't just one way, there are multiple ways, and it's wonderful that the students were able to figure this out on their own.	I would congratulate him, tell him to go to the board and explain it to his classmates, and then I would say this sentence in class: Mathematics is about equality; we always find equality in some way. You can do this with any method, any solution you want; you just don't have to follow the method I taught you.	I think other students will also participate better in class if they think, "I can find my own methods too."
4	P10	Girl	2.6	Gazi University	Anatolian High School	4	He is disturbed by his surroundings, he cannot learn, he is negatively affected.	Noise pollution in the environment	Don't be influenced by your surroundings; you've understood it before, you can understand it again.	You are undermining his self-confidence and the self-confidence of those around him.	Because he's struggling, he's questioning whether it will be useful to him, thinking he shouldn't bother trying.	Mathematics is present in every aspect of our lives; it allows you to think differently and helps you find easy solutions to everyday problems.	The fact that mathematics enables effective thinking will impress everyone.	Making fractions concrete provides effective learning.	I tell him he did well when he takes the fractions to the board, draws them with correct representations, and shows them to his friends.	Encouraging him to learn	The inquisitive student who thinks before acting.	Bravo, that's great that you discovered it yourself!	Congratulations Elif! This will motivate others to try their own methods to receive congratulations in the next questions.
4	P11	Girl	3.75	Gazi University	Science High School	4	She may have problems with focusing or a trauma related to noisy environments. Reliving this situation triggered Ayşe, and her brain focused on other things instead of the subject, causing her to shift her focus away from the lesson. This, in turn, awakened fear and panic in her.	In my opinion, it could be a fear of not being able to learn due to a focus problem, or it could be a fear stemming from trauma. To be completely sure, I think it's necessary to communicate with the student one-on-one.	You're only thinking that way because your attention is distracted during the lesson. If you understood a topic once, you can understand it much more easily the second time.	I aimed to change his fear and anxiety about not being able to learn because calming him down and believing he can do it is important for him to be able to refocus.	I never see it as disrespect. I view it as an outburst stemming from the process. Because there's a kind of burnout that comes from feeling under pressure, and the student needs to express that somehow.	First, I would talk about how solving a challenging math problem affects the mind, and how facing such questions and problems improves our thinking skills, as well as our perspective on everyday problems. Also, while it might not seem like math is necessary to become a football player, the field you play on is designed using mathematics, and a shot needs to be taken at the right angle to hit the …	When answering the question, I first used a general example to keep the whole class engaged. Then, I gave a specific example, trying to answer the question by involving the entire class.	Every individual learns differently. If someone grasps things better this way, I wouldn't consider that a negative thing. In fact, since expressing fractions through shapes is quite important for understanding and retention, visuals can be used more actively in teaching.	Let's turn this into an activity, and you can draw the diagrams representing the fractions I've written on the board in your notebooks. This way, I won't discourage Can's learning motivation, and I'll also ensure that my other students benefit from this learning method.	I didn't want Can to develop a negative attitude towards the lesson; on the contrary, I wanted him to think positively about it by involving the class in what he was doing. Furthermore, this approach might strengthen his communication or affection for me, thus leading him to develop a more positive attitude towards listening to me and being more engaged in the lesson.	I believe she approaches problems from a different perspective and has well-developed mathematical reasoning skills. Because being able to reason about a question requires using the information at hand. Elif used the data she had well and reasoned based on that information.	"It's really great that you solved the question from your own perspective. Well done, my genius girl," I would say. Knowing that what one has done is right and good is a very important motivation for a person, and the expression "well done" is appropriate here to keep Elif in her current position, given her age.	Actually, this situation is a negative thing for the other students in a way, but to prevent this, I would first explain that it's perfectly normal that they couldn't solve the problem immediately because it was really difficult. Then I would ask Elif to explain her strategy to the class and have the other students try again using that strategy. If it still doesn't work, I would say, "Let's solve…
4	P12	Boy	3.73	Gazi University	Science High School	5	From what I understand, she has high levels of anxiety and stress. I think the inability to do something she thought she could do, due to negative factors in her environment, led her to think things like, "I thought I could do it, but now I can't, so I can't do anything," and she felt quite helpless.	I believe the root of the problem lies in Ayşe's rather sharp understanding of the concepts of learning and assessment. Her inability to solve the problem led to intense anxiety. However, if she had been aware that the inability to solve a problem depends on multiple factors, I think she would have moved from intense anxiety about not understanding the subject to a more accurate assessment of the…	Ayşe, you said you were able to do this at home, so it means you understood the topic. Don't think you didn't understand just because you couldn't solve one question. Right now, the noise is bothering you, and these things can happen to anyone. Now, relax a little and let's look at the question together :)	I aimed to change Ayşe's feelings rather than her thoughts. Because the current problem is more of an emotional turmoil than a cognitive deficiency. Therefore, I aimed to make her feel emotionally well and secure.	I see it as an expression of need because I think it's normal for all of us to tend to run away when faced with a challenging situation. Furthermore, as their teachers, I must guide them not only cognitively but also emotionally and behaviorally.	"First of all, I appreciate your honesty in raising a question that perhaps crosses all our minds from time to time. It's quite normal that you think mathematics won't make you a football player. However, you can think of it this way: for example, x and y values ​​are values ​​we don't know but need to find, and in football, the answer to the question 'Which tactic brings more goals?' is somethin…	"Friends, Mert's question is one that crosses all our minds from time to time. However, mathematics doesn't prepare you for a specific profession; it prepares you for all professions. You can think of it like sports. While sports strengthen your physical muscles and increase your chances of a healthier life, mathematics does this mentally. Having a mathematically strong mind allows you to generat…	I wouldn't call this skipping class, but rather a different way of learning. I think they understand better in a more concrete way. From a constructivist perspective, I also see it as quite good. Furthermore, the fact that they do it independently is very valuable because it shows me they can take responsibility for their own learning.	"Can, the pictures you've drawn are really beautiful, and your way of expressing fractions is quite creative. If you'd like, we can review fractions on the board using your pictures in a moment. Everyone can try to represent a fraction with a picture in their notebooks." I try to approach Can with a supportive attitude. By transforming Can's individual activity into a class activity, I try to mak…	I think I'd maintain my authority in a guiding rather than a repressive way. I wanted to give her emotional stimulation, like, "I know what you did, it's really nice, I like it, I even want the whole class to see it." This way, the emotional connection between us would develop positively. I also think it would create a safe classroom environment for the other students who witness it.	I believe he thinks conceptually rather than procedurally. Also, the fact that he didn't give up despite not remembering makes me think he's a self-confident individual.	I would respond with something along the lines of, "It doesn't matter if you don't remember the formula. What matters is that you don't give up and find your own way. In mathematics, the most valuable thing is not giving up when faced with a problem." My main goal is to make them understand that it's not about genius, but about the effort put in. This way, instead of the "I'm a genius" mentality,…	I ask Elif to explain her solution. Then I tell the class that there is more than one way to solve this problem, and Elif found one of them. I ask what other solutions there are. In this way, the other students perceive Elif not as more intelligent, but as a student who thinks differently, and they receive the message that they can do the same thing.
4	P13	Girl	3.21	Gazi University	Science High School	4	The noise in the classroom prevents him from focusing on the questions he's reading, and as a result, he can't understand what he's reading. He blames himself for his inability to understand and feels upset.	The root of the problem is the noise in the classroom. Because in that noise, the brain has difficulty focusing on what it is reading.	I tell them that their inability to understand or do something is more due to the noise in the classroom than to themselves. Then I warn the class. I tell them they are infringing on the classmates who are studying. I make them be quiet.	I help them look for the problem not only in themselves but also in their surroundings. I help them understand that the source of our problems doesn't only stem from us, but that we are also affected by our environment.	I see it as both. Raising his voice is disrespectful, but questioning is an expression of need. Because raising his voice to that extent bothers me and his other friends. His questioning shows that he is searching for meaning, that he wants to make an effort to fulfill a need.	I would say that many of the things we learn will be useful in life, and that learning new information improves our brains. I would also say that even if someone wants to be a football player right now, you never know what life will bring, and perhaps they might want to pursue another profession in the future, and this knowledge might be necessary then.	I try to give examples for each. Different professions have different requirements.	He is actually interested in the lesson, but in an incomplete way. Because he is only focused on drawing what he understands or sees. He is not fully listening to the lesson and is distracting his friend.	I would encourage Can to use his drawing skills on the board and create visuals to illustrate the topic I was explaining so that his classmates could understand better. But I would also emphasize that he needed to focus not only on drawing but also on the lesson.	My goal was to both warn him and keep his talent alive without losing it, and also to use that talent.	It's a good thing for something to find its own path. Because we can't live by only fitting into certain patterns. This is also true in mathematics.	I would congratulate him on his own path. I would tell him to keep his knowledge sharp, using his practical intelligence as well as putting it into practice.	I would tell them that, like Elif, they could solve it in different ways, and also using the techniques I taught them. I would make them feel that they could find their own methods by thinking for themselves.
4	P14	Boy	3.19	Gazi University	Science High School	4	I think Ayşe was already a student who struggled with math, and when she couldn't do the math because of the noise during the lesson, she got stressed, but because she's shy, she couldn't say anything to her friends.	Students making noise reduces the interest of even those students who are engaged in the lesson.	I would tell him that I'm aware of the noise in the classroom, that it's normal he can't figure it out right now, and that I think he'll be able to figure it out when we get home and I don't say it again. And I would try to stop the noise in the classroom.	My goal was to make him understand that he shouldn't give up on mathematics so easily. Because even this small moment can change his entire perspective on mathematics.	I see it as an expression of need. Because there's no personal insult directed at me; she's simply starting to question things as befits her age, and she's actually expecting help and support at that moment. I just wish she hadn't raised her voice.	I would tell him that mathematics would give him different perspectives, that it's not just about calculations, and that it would also be useful in football when planning plays and scoring goals.	My answer can be generalized to everyone.	It seems he's a visually intelligent child, and he wanted to learn the subject this way and make it fun.	I liked what Can drew in his notebook, so I'd like him to come and draw it on the board and explain it to the class.	My aim was to build Cana's self-confidence and prevent her from becoming discouraged by mathematics.	I thought he had good math skills and was a persistent, solution-oriented person.	Well done Elif, you solved the question beautifully. Math isn't always about formulas, and there's no single way to solve it. Never give up and keep trying.	Sometimes we may not be able to solve every question, not every solution may come to mind, but as you solve problems and try harder, you will begin to see different approaches.
4	P15	Girl	2.98	Gazi University	Anatolian High School	3	He became discouraged when he couldn't do a subject he thought he understood and could do in class because of the noise.	Overcrowded classrooms make it difficult for teachers to maintain control, which negatively impacts students who are attentive and interested in the lesson.	I would tell him that I know he understands the topic and can do it, and that the reason he couldn't do it was because of the noise in the classroom. I would tell him to try again and that he would succeed.	To prevent him from becoming hopeless and giving up.	I see it as a need; if, while teaching, we explain the topic abstractly without relating it to where we will use it in daily life or what its usefulness will be, it's perfectly normal for students to question it.	Mathematics also broadens one's perspective and strengthens reasoning abilities. It allows one to look at a situation from multiple angles. Yes, you won't use these calculations while playing football, but the brain you develop through what you learn will benefit you in football.	Generally, I would talk about the importance of learning mathematics, saying that it's not just the topics we learn, but also the things we gain from understanding and learning them that are important in our lives.	I think it's great that she understood and expressed herself in that way. Not everyone has to express what they understand in the same way, but showing it to her friend and trying to impress them is wrong.	I would ask Can if he wanted to show his drawings to his friends, and then we would show them to the class together.	My aim is to increase his interest in the subject by making him feel that he understands mathematics and is successful, rather than making him feel that he did something wrong.	I think this is a great situation. It shows that mathematical thinking skills have developed. He may have forgotten the formula, but because he understood and grasped the logic of what he was doing, he was able to discover other methods.	I congratulate and encourage her, and I ask her to tell her classmates about it. This kind of support will boost her self-confidence.	I would ask if anyone in the class had solved the problem in a different way, and I would also ask the students who solved it using the formula to explain it on the board.
4	P16	Girl	3.3	Gazi University	Anatolian High School	4	The feeling of inadequacy towards mathematics stems from the belief that they quickly forget what they learn, whereas they will remember it if a suitable learning environment is provided.	Despite not all students in the class paying attention to the lesson, there is enough noise in the classroom to disrupt the lesson.	I try to remind them that these situations can arise from time to time, and the important thing is not to give up in such situations.	I wanted to prevent his love for math from turning into hatred because sometimes, once children lose interest in a subject, it may be impossible to bring them back.	We shouldn't interpret this as disrespect because the sentences he used are quite natural, these are questions every student has in mind, so we should turn this crisis into an opportunity and give him satisfactory answers.	Let me first give an example from my own situation: For instance, who do you think calculates how many kilometers you need to run in 90 minutes in a match, your speed, your heart rate, and your training program?	x and y are actually things we don't know but want to find out. Mathematics doesn't teach us a profession; it strengthens the muscles of our brain.	Some children understand better by drawing and visualizing than by listening, and Can's case is exactly like that.	We can invite Can to the board and ask him to draw pictures related to the topic; this way, we can also attract the attention of other students in the class who have strong visual memory.	My aim was for the drawings in the lesson to be relevant to the lesson and to be used to teach the lesson.	Finding different solutions doesn't mean he wasn't listening to me; it means he was paying close attention to the question and that's why he found the answer.	I say encouraging and appreciative things, which makes them more interested and motivated.	I thank Elif and invite the others to try solving the question as well, saying that I would like to hear her solution after the others have solved it.
4	P17	Boy	3.11	Gazi University	Science High School	4	The feeling he experiences is despair because he believes that a moment of inability to act will affect his entire life.	Lack of a suitable classroom environment	I would tell him that it's a process, that life has its ups and downs. I would tell him that as long as he works hard, he can achieve great things.	Despair is a problem because we shouldn't make decisions that will affect our lives based on a momentary feeling.	I see it as an expression of need because a person's future profession should be aligned with their interests and they should enjoy doing that profession.	First of all, I advise you to pursue your dreams. You're at the beginning of your journey, and I think you'll become a very good football player if you work hard. But don't disregard the importance of mathematics in our lives. These topics may seem unimportant to you now, but you never know what life will bring, and I can tell you clearly that mathematics is one of the most useful disciplines in …	I emphasize the place and importance of mathematics in our lives and give examples of how mathematics is used in daily life. Because at that moment, these thoughts are actually in the minds of many of the students.	I think that's better because I believe learning something by drawing is more effective and lasting.	At that moment, I have everyone draw what they remember about the topic we learned in their notebooks and create a discussion environment with the person next to them.	I'll make sure you don't get upset with me or my lesson. I know that when a student loves their teacher, they'll love their lesson too.	I think it's a pretty good thing. It does a good job of reasoning.	I say things that will please her, and I also incorporate questions like these into my lessons.	I'll explain the logic behind each question individually, then we can do a collaborative problem-solving activity in class where we can comfortably exchange ideas. This way, students learn new ideas, and when one student answers correctly, it's like the whole class answered correctly.
4	P18	Boy	3.12	Gazi University	Science High School	5	The noise in the classroom has ruined his morale and motivation.	I think the problem is a lack of self-confidence because Ayşe says she can do it at home.	I say, "I know you can do it," to boost your morale and motivation.	I think Ayşe lacks self-confidence; this sentence will boost her self-confidence, even if only a little.	I think it's an expression of need, because he/she has expressed himself/herself sincerely.	I would give some unforgettable examples about the importance of mathematics in our lives. Then I would say that if you want to be a football player, you can be; there's no rule saying you have to study it.	I would emphasize that living without knowing mathematics is actually an incomplete life.	If he understands it better that way and it reflects his success in exams, I won't stop him, because I don't want to discourage him from studying.	If what I've written on the board seems complicated to you, I'll tell you to write it down in your notebook in a way you can understand, so everyone can follow the path that works best for them.	My primary goal is to maintain his interest and attitude towards mathematics.	I think she's a smart girl.	I congratulate him and will give him a small reward; this will further boost his morale, motivation, and self-confidence.	I'll write a few more questions like that and have other students solve them as well.
4	P19	Girl	3.76	Gazi University	Anatolian High School	5	Ayşe can't do math in class because the classroom is too noisy, even though she understands and believes she can do it at home. The noise causes her a lot of stress and anxiety. Because of this excessive pressure, Ayşe thinks she will never be able to do math. I think Ayşe is very affected by the classroom environment. Perhaps this is even why she has become a quiet student.	The root of the problem might be Ayşe's low self-confidence and her tendency to be overly influenced by external factors, ultimately leading her to believe the problem lies within herself. As I mentioned in the previous question, I think Ayşe is excessively influenced by her classmates. She might also be sensitive to excessive noise. Considering she's alone at home and studies quietly, the classr…	First, I would tell her to close her eyes and take a deep breath. Then I would say, "Ayşe, I know you understand this and that you can really do it. Right now, it's very noisy in the classroom, so you might be confused and not understanding the questions, that's perfectly normal. But that doesn't mean you can never do math. Maybe you can focus a little more on the questions and put the noise of t…	Ayşe has a little weak self-confidence and belief in herself. When things go wrong, she immediately thinks the problem is with her, that she can't do it. That's why I told her I believe in her, so she would find courage and self-confidence. I also told her that it's normal for her to get confused because the classroom is noisy. This way, she can realize that the problem isn't with her, but someth…	I think she's in her exam year, feeling overwhelmed, and resorted to this to get attention, vent, and relieve some stress. Therefore, I wouldn't see her reaction as disrespectful. Because an 8th-grade student, only 13-14 years old, just entering adolescence, can see their world and responsibilities as consisting solely of studying, solving problems, and taking exams. In fact, some take it so seri…	"You might not be able to relate the topics you're seeing in class to football. From that perspective, you might even find them absurd. But mathematics isn't just about x and y. It's much more than that; it's a field that manifests itself everywhere, sometimes subtly, sometimes openly. For example, in football, when you pass to your teammates or shoot at the goal, you need to send the ball at a c…	"This was just an example. No matter what profession you choose for the future, you'll always find mathematics involved. I understand you. You're very tired, and constantly solving problems might be overwhelming you, even making you nauseous. But mathematics isn't just something you'll need for exams. Perhaps if you look at mathematics differently, it won't feel like torture anymore," I would say…	Can shows that he understands this topic better through pictures and representations rather than straightforward explanations. Therefore, I wouldn't be angry with him. Because every child is unique, and everyone learns and understands mathematics in different ways.	"Can, the pictures you've drawn are really good. Could you draw one on the board for your classmates to see? Maybe your friends can understand the topic better with these pictures, just like you," I would say. That way, I would have engaged the students in active learning. It would also have been an opportunity for Can to express himself.	By saying this, I aimed to make Can more active in class and show my interest in his drawings. Because if I had been angry with Can, he might have become disillusioned with the lesson. I might even have stifled his artistic talent and imagination. Instead, I thought that by encouraging him to share his talent with the class, it would be very beneficial for both him and his classmates.	I think Elif is someone who doesn't give up and always looks for different solutions. She might have a stubborn and determined nature. Because even though I gave her a challenging problem, she didn't give up; even if she forgot the method I taught her, she found another way and resolutely followed it. In the end, she got what she wanted.	"Elif, congratulations! There isn't always just one way to solve problems. Besides the method I taught, there are other ways to solve problems, like the one you found. It's great to be able to solve problems in different ways. You don't always have to go with just one solution," I would say. Because a problem can have more than one solution. Keeping students tied to a single path negatively impac…	"Elif, can you tell your classmates how you solved the problem? Children, Elif solved the problem in a different way than I taught. Maybe this way is easier for you than the one I taught. Let's listen to Elif, and then let's solve this problem using the way I taught. Afterwards, let's discuss these two solutions, okay?" I would say. Because here, I wanted to reinforce the positive feelings Elif e…
4	P20	Girl	3.67	Gazi University	Anatolian High School	4	Ayşe couldn't fully concentrate due to the noise in the classroom and therefore couldn't answer the question. She then generalized this experience to her entire educational life. I believe the reason for this is that Ayşe is an average student in mathematics, meaning she generally struggles with understanding. However, she studied the topic and became overconfident after solving the problems. Exp…	The problem here is the inability to ensure the participation of the entire class. This is because the lesson is not being taught in an engaging way. If the lesson only appeals to the students in the front row, we will first lose the respect of the students in the back rows, and then the entire class.	Ayşe, my dearest daughter. I see the disrespect your classmates are showing right now, and I will make sure it doesn't happen again. I also see your efforts to participate in class. What matters to me is the effort you're showing right now. There's nothing you can't do if you put in the effort. I realize you understand this very well. But today, you couldn't fully focus because of the noise your …	With the sentence I constructed, I actually wanted to point out that the reason for Ayşe's feelings wasn't solely due to one-sided factors. The blame isn't always only on the student. Teachers can also make mistakes unintentionally. What's important is that, as individuals detached from their social status, we recognize our mistakes, apologize, and know how to make amends. Through this conversati…	Mert couldn't control his reaction at that moment and spoke that way. I don't see it as disrespectful, considering both his age and the pressure of the LGS exam.	Mert, all sciences are interconnected. For example, the desks you're sitting at right now, the architecture of buildings, the mineral balance of the water you drink, the size of your shoes... I could give many more examples from daily life. Besides these, the dimensions of the football field you'll play on, the angle the ball makes with your foot, your average speed during the match, the weight, …	When giving this answer, I wasn't just addressing Mert specifically, but answering in a way that would concern the whole class. I explained that mathematics is a fundamental science and will be relevant to all career choices.	Every student learns differently. The important thing is to try to engage all students during class time. If Can understands the topic more easily this way, I will support him in continuing. I also include activities like this to keep Can and his classmates engaged during the lesson.	First, I go to Can and want to look at his drawings. I briefly listen to what he was thinking when he drew them. I tell him that they are all very beautiful, but that he shouldn't interfere with his classmates' learning while doing so. I take Can's notebook and show it to the whole class. Aren't they beautifully drawn? These aren't just pictures. Can has beautifully given meaning to the subject i…	I wanted to show Can that I noticed and appreciated his effort to learn. By showing his drawings to the whole class, I wanted his classmates to know that he wasn't just trying to skip class, but that it was a way of learning. Afterwards, I aimed to draw attention to this not just with Can, but to the whole class. Because while I noticed it only in Can, other students might have been doing the sam…	In fact, the foundation of every formula is logic. Elif approached the issue not just as a formula, but by understanding its underlying logic. This actually brings her success in most of her subjects. Because what matters is being able to grasp the logic behind what you learn, thus achieving meaningful learning.	Well done, Elif. It seems you've truly grasped the logic behind the concept. You've shown us, with a wonderful example, that the important thing isn't knowing the formula, but being able to create one ourselves when needed. You can achieve success like this not only in math but in other subjects as well, by understanding the logic behind the concepts. Congratulations!	I give a general speech to the class: "Friends, the question I wrote on the board was a challenging one that required reasoning. It meant we needed to fully grasp the concept and be able to visualize it in our minds. Let's not view our lesson solely as formulas and rote memorization. Everything we learn has a logic behind it. And when I teach, I try to convey this logic, the underlying idea of ​​…
4	P21	Boy	3.15	Düzce University	Anatolian High School	3	She felt bad when she came to class and became anxious about not being able to do it.	The learning environment has affected the students in the classroom.	Calm down, I know you can do it, don't blame yourself. Let's get the classroom noise under control and continue.	I reminded her again that she needed to believe she could do it, and I considered changing her tendency to blame herself.	Of course, it's not disrespectful; I see it as a very sound approach for those who won't be using mathematics.	If you want to be a football player, you need to be good at math so you can get high scores on your exams and achieve your goal. Besides, math is everywhere.	It's not just football; for other professions too, children, first and foremost, you need to have good exam results. Even if you don't see it, there's a lot of mathematics behind your dream jobs. Knowing this won't hold you back; on the contrary, it will always propel you forward.	The fact that mathematics has been visualized indicates that the subject is better understood visually. This should be incorporated into lessons to attract the student's attention.	I would say to Can, "You've drawn so beautifully, can you show us what you're trying to convey?" He would explain, and then I would say, "Like Can, I want everyone to draw pictures showing fractions," thus including Can in the classroom and creating a positive learning environment.	I wanted to bring him back to the classroom environment by taking a constructive approach, without distancing him from me.	It shows that he/she can use reasoning skills.	You're doing great, Elif. In mathematics, formulas actually come from these kinds of proofs and diagrams. Understanding the logic behind the formula is always more important than simply knowing the formula itself. And you've succeeded in that. You can think this way about other questions too.	Not everyone has to solve it this way; everyone can have different ideas.
4	P22	Girl	3.54	Gazi University	Science High School	3	A sudden state of helplessness, but a changeable emotional state.	He thinks his focus problem stems from his inability to understand mathematics; he doesn't realize he can do it if given the right environment and conditions.	I would tell him to calm down, try to focus, that he's doing quite well, and that if necessary, we can revisit the topics and questions in a quieter setting.	Because he/she generalized for the wrong reason, I will give him/her more detailed information about the reason for his/her difficulty in order to boost his/her confidence.	I use the word "need" because I also have a student like that, and given their age and situation, they can't grasp the reasons behind things and react impulsively because they lack detailed information about the process.	I provide information about the mathematics needed for the field they want to study, explaining in detail what is essential for achieving their dreams.	By providing examples from daily life, I help children who want to pursue careers in other fields to gain insight into how they can use mathematics in their desired areas in the future.	Every child is unique, and therefore their learning and application methods are also unique. That's why I don't think this is wrong; on the contrary, I believe it leads to successful learning because children often fail to discover their own learning style.	I would identify students' learning styles through various classroom activities and a class-wide approach, guiding them towards a more suitable learning style by discovering those who learn more easily in this way.	I aimed to create a more understanding and usable communication style; otherwise, if I forced them to learn a specific pattern, they might get bored faster and react more aggressively.	I see him as someone focused on finding a new strategy and path appropriate to his situation in challenging circumstances.	I can tell them that they should always proceed in the same way, that things won't always go smoothly, and that sometimes they will discover their own path using different methods. After that, I encourage them to understand the logic of the subject and events without memorizing things.	I show everyone that in some situations they can generate mathematical reasoning instead of ready-made solutions, and I demonstrate the different types of this reasoning.
4	P23	Girl	1.66	Gazi University	Science High School	3	Ayşe's situation is a "mental blockage" triggered by the intense influx of stimuli created by the noisy environment, accompanied by a "feeling of inadequacy." Because the noise overloads Ayşe's working memory, preventing her from recalling information she already knows, Ayşe attributes this temporary focus problem caused by environmental factors to her own intelligence or ability, leading to deep…	The root of this problem lies in "the disruptive effect of environmental stressors on cognitive performance" and the resulting "breakdown in self-efficacy." Ayşe internalized the noise, an external obstacle, and began to interpret a temporary concentration problem as a permanent learning disability.	"Ayşe, the reason you can't do it right now isn't because you don't know the subject, it's because your brain needs a rest amidst all this noise. Let's put this page aside for a moment and take a deep breath together. You accomplished this at home, and the chaos here doesn't diminish your success at all," I say. The reason for this approach is to break the anxiety cycle in the student, shifting t…	With this sentence, I aimed to change Ayşe's generalized belief in her inadequacy—that she "could never do math"—and the accompanying feeling of helplessness. The reason I aimed for this change is because Ayşe incorrectly attributes her cognitive blockage to her own intelligence (internalization); therefore, by shifting the focus from her own capacity to an external and temporary factor like nois…	I see Mert's outburst not as disrespect, but as an emotional "need for meaning and help" stemming from the intense pressure of the exam. The stress of the LGS (High School Entrance Exam) process, as the subject became more abstract, triggered a defense mechanism in Mert; this erupted into an outburst fueled by the thought, "It won't be useful to me anyway." Mert is not actually questioning the te…	"Mert, you're right; you won't be using factorization at the grocery store. But that green field you're imagining is actually a giant coordinate plane. The best footballers are those who can calculate the angle of the ball's approach and the distance their teammate will run (those x's and y's) in their minds within seconds. We're not just solving math problems here; we're doing strategic thinking…	I would generalize the answer I gave Mert to the entire class, positioning mathematics not just as a subject, but as a "mental operating system" for every profession. Turning to the rest of the class, I would say, "Friends, Mert's question is actually very critical for each of your futures; because no matter what job you do, mathematics will be your strategic strength in that field," thus establi…	I view Can's behavior as extremely positive, as it's a process that concretizes mathematical concepts and makes learning permanent. Can internalizes the subject through a meaningful learning strategy by transforming abstract fraction expressions into images of cakes and pizzas that suit his interests; this is a creative cognitive process that facilitates the transfer of knowledge from theory to p…	I address Can and the class, saying, "Children, Can just turned fractions into a wonderful feast; Can, would you help us explain the process of fraction distribution using your visuals by transferring these delicious models you drew to the board?" The reason for this approach is to honor Can's creativity by transforming his potentially problematic behavior into a tool for "peer teaching" and "act…	With this approach, I aimed to shape my relationship with Can not as a "controlling and restrictive authority," but as a "guiding partner who affirms his potential." The reason for this is to strengthen the bond of trust between us by making Can feel that I accept his unique learning style not as a mistake but as an asset, and to increase his sense of belonging to the lesson, transforming his cur…	Elif's ability to devise her own solution despite forgetting the formula demonstrates her strong metacognitive thinking and flexible problem-solving skills. This shows that Elif understands mathematics not as a set of rules based on rote memorization, but as a logical structure; she is a creative and in-depth learner who can reconstruct information by breaking it down into parts, rather than pass…	I say to Elif, "You're amazing, Elif! You acted like a true mathematician; because formulas can be forgotten, but building a new path by reasoning as you did is the greatest genius, and reaching the result through your own discovery is far more valuable than memorizing the formula." With this statement, by rewarding the "discovery process" rather than the result, I aim to base Elif's success not …	I present Elif's solution as "a new discovery we can all learn from" and say to the class, "Friends, Elif showed us all a way out today; formulas can sometimes limit us, but creative approaches like breaking down the shape always work. Let's try this new technique together now." The aim of this approach is to position Elif not as an unattainable figure, but as a "guide" who contributes to the cla…
4	P24	Boy	3.25	Düzce University	Anatolian High School	5	Ayşe's situation is one of cognitive blockage and helplessness, caused by environmental factors despite her desire to learn. The root of the problem isn't Ayşe's inadequacy in mathematics; it's her distraction due to noise, which she interprets as a personal failure.	#VALUE!	“Ayşe, what you’re experiencing right now isn’t that you can’t do it, it’s that your brain is tired from the noise. Since you can do it at home, you know how to do this. Let’s take a deep breath together, I’m here and we’ll try again in a moment.”	With this sentence, I aimed to transform Ayşe's thought of "I can't do it" into "the circumstances are difficult right now." My intention was to preserve her hope and eagerness to learn.	I see Mert's reaction not as disrespect, but as a clear expression of need. He's experiencing anger because he can't reconcile mathematics with his life, and he's expressing this anger verbally.	I would explain the value of mathematics to Mert as follows: I would tell him that being a football player and a coach requires reading statistics, analyzing player performance, and planning tactics, and that these are all connected to mathematics.	I would return to the class and establish a common context by emphasizing that mathematics is useful for everyone in different fields, and that this subject is about learning to think, not just for a single profession.	Can's approach is quite valuable in terms of learning mathematics. He learns the subject by visualizing it in his own words and experiences an active learning process.	“Can’s pizza drawings illustrate fractions beautifully. Let’s look at them together: How many parts is a whole divided into in this picture?”	With this reaction, I aimed to send Can the message that "you're not doing anything wrong," thereby establishing a relationship based on trust between us.	Elif forgetting the formula and finding her own way shows that she possesses advanced thinking skills. It suggests that she focuses on understanding rather than memorization.	"Elif, you just thought like a mathematician. Not remembering the formula isn't a weakness; finding your own strategy is a great achievement."	I would examine Elif's solution with the class and transform her success into collaborative learning by saying, "This method has given us all a new perspective."
4	P25	Boy	3.28	Düzce University	Science High School	4	Ayşe is experiencing performance anxiety due to intense pressure. The noise has triggered the thought of "I am a failure" in her mind. The real problem is emotional overload.	#VALUE!	"Ayşe, it's perfectly normal to be struggling right now. This doesn't mean you don't know math. Once the noise stops, your brain will relax, and together we'll succeed."	My goal was to reduce Ayşe's negative self-image and make her feel safe.	I definitely see this reaction as an expression of need. Mert is essentially asking, "Why does this course exist?"	I would explain to Mert that in the world of football, concepts like speed, angle, ratio, and statistics are related to mathematics; that mathematics is not an obstacle to his dream, but a support for it.	Turning to the whole class, I would create a shared motivational space by saying, "We all have different dreams, but this lesson teaches us all how to think."	Can's drawings are a natural way of learning. This behavior shows that he is not disengaged from the lesson; on the contrary, he is participating in the lesson in his own style.	"Can, your drawings are very creative. If you want, you can explain them to the class on the board; let's learn fractions using your pictures."	With this approach, I aimed to make Can feel valued in the classroom and to develop a positive relationship with him.	Elif's behavior shows me that she thinks flexibly and creatively when it comes to problem-solving.	"Elif, today you didn't just solve a problem, you discovered a new path. That's exactly what mathematics is."	I would tell the other students, "This solution showed us different ways of thinking," emphasizing that success is a shared achievement, not an individual one.
4	P26	Girl	3.12	Düzce University	Anatolian High School	4	He became hopeless, thinking he couldn't do it on his own due to external factors.	The teacher's inability to manage the classroom.	I tell him he can do it and that he needs to have confidence in himself.	Confidence	It's an expression of need, but the tone is inappropriate.	I would say that through mathematics, you will gain multifaceted thinking skills.	I continue to teach the lesson in a way that is more fun and doesn't provoke them to rebel.	I assume they understand the concept and are practicing effectively, so I'll bring them to the board so their classmates can see.	I tell him to come to the board and write.	I would explain that I'm not angry and that what he's doing is actually helpful, and that he should have shown it to me instead of just his friend.	He developed a different way of thinking.	Congratulations, and small gifts to encourage a love of mathematics that will make him happy.	By randomly calling a student to the board and helping them, the teacher shows that they can do it too.
4	P27	Girl	3.21	Gazi University	Anatolian High School	4	It's a bad situation because while she's trying, she might feel like her efforts are in vain due to being negatively influenced by her friends.	The root of the problem is that those at the back are disrupting the classroom atmosphere.	You're right, Ayşe, I'll restore order now, you just stay calm.	I aim to change the idea that things will always continue that way.	I don't see it as disrespect; I see it as a complaint stemming from being overwhelmed by her situation.	Unfortunately, nothing works without mathematics, Mert.	While trying to calm Mert down, I speak in a general way that the class will understand, so that everyone will be interested.	Actually, being able to apply logical mathematical language to visuals is a particularly useful method for exams.	I would tell Can that what he did was logical and that he should share it with the class.	I aimed to resolve it without causing mutual harm or resentment.	That's a good thing, I think he can handle it on his own since he's in that situation.	Congratulations Elif! That's something very few people would think of.	I would say, "Another solution besides the one Elif found is like this," and then I would solve the question.
4	P28	Boy	3.20	Gazi University	Science High School	2	I think Ayşenur is in a crisis situation and is reacting with anger.	The root of the problem is that Ayşe is overly bothered by the noise and attributes this annoyance to her inability to do mathematics.	I would tell him that he can do math, that the problem that's triggering him right now is something else, and that he should try again when the circumstances are different.	I aim to calm his sudden anger.	I wouldn't exactly call it disrespect, but it wasn't entirely an expression of need either. Mert's reaction was an inappropriate way of expressing himself due to being unable to withstand the pressure. The problem itself can be understood, but the way he expressed it is unacceptable.	Being a football player doesn't require someone who doesn't know mathematics or is uneducated. Mathematics isn't just about x's and y's. Mathematics gives people analytical thinking skills. Analytical thinking skills, practical intelligence, and quick thinking are extremely valuable and necessary for a football player.	Mathematics will only be important and necessary for them to survive and become football players.	As long as Can's behavior doesn't bother his classmates, it's not a problem. Every student learns differently. As long as he doesn't disturb those around him or distract his friends, he can learn in the way he wants.	Instead of Can whispering about how he makes sense of things to his friends, he could be encouraged to go to the board and share his thoughts with the whole class, and get his classmates' opinions on the matter.	Without putting pressure on them, I'll tell them what part of what they're doing is wrong. It's very important not to offend the student here.	Elif's ability to find her own methods and generate alternative solutions shows that she has learned the subject in depth. It also suggests that she possesses skills such as creative thinking and problem-solving.	The feeling of being a genius is very precious to Elif. To ensure she never loses this feeling and to reinforce it, I tell her to engage in complex, thought-provoking problems, especially those based on modeling or problem-solving processes. These kinds of problems won't be solved with formulas; they require thinking and will give her a sense of accomplishment when she solves them.	I would like Elif to share the solution she found with her friends and for everyone to give their opinions on the solution.
4	P29	Girl	3.41	Gazi University	Science High School	4	I understand Ayşe very well; I experienced the same situation during my TEOG exam. Not every student shows the necessary interest and respect for the lesson. Ayşe feels inadequate here, and she attributes it to the noise. Ayşe listened and studied in class, but because of the noise, she feels insufficient and loses faith in mathematics.	The root of the problem here is the family. Families should talk to their children about the importance of mathematics and raise awareness. If the family's socioeconomic level is low and they have little information about the school, then the families and students should be educated by the school counseling department.	I want to convince her and make her come back by saying, "Don't lose your faith, realize that you can't do it because of the noise, but I know and believe you can. Go back to your studies and see what you can do."	I wanted to change Ayşe's belief that she couldn't do math. People live what they believe. I didn't want her to live that way.	I see it as both. Suddenly getting angry and raising his voice is disrespectful to the class and the teacher. Regardless of the circumstances, you shouldn't speak loudly to a teacher. Also, Mert is right; algebraic expressions are one of the rare topics that appear in everyday life. However, taking these courses is mandatory for him to graduate and comply with the education system.	I understand you perfectly, Mert. It's great that you want to be a football player. Yes, you're right, you won't be thinking about algebraic expressions while playing football, but to become a football player, you need to learn this subject to a certain level.	Yes children, you all have very different dreams. Some of you want professions related to mathematics, while others want professions unrelated to mathematics, but to succeed in your LGS exam, listening to this lesson and succeeding is essential.	The decorations and drawings she made in her notebook related to the lesson reflect her perspective. Because her visual intelligence is well-developed, it complements mathematics. Therefore, I consider this a positive statement.	Yes, children. Can has drawn some really nice pictures, but he only shows them to his classmates. Let's have him come to the board and show them to the whole class and explain them, Can. That's what I'd say; I'd turn the crisis into an opportunity, I don't want the lesson to be disrupted. I want the whole class to see it and understand that fractions aren't just written, they also have a visual a…	His decision to go to the blackboard and praise his teacher, expecting her to be angry, strengthened the relationship and increased her interest in the lesson.	He seems to have a research-oriented mindset because he believes the problem can be solved without being bound by formulas.	Yes, you're amazing, Elif. Congratulations! Yes, kids, let's applaud your friend Elif. I'm congratulating her and boosting her self-confidence by saying, "Let her come and tell you about the result she achieved without relying on a formula."	Yes, children. Formulas are a shortcut for us. But sometimes they might be forgotten, so don't give up and keep trying; you will definitely reach the result. After listening to your friend Elif, I will give you a similar assignment, and I believe you will all be able to solve it without formulas. And I will make them believe that they can do it too.
4	P30	Girl	2.89	Düzce University	Science High School	4	Ayşe couldn't understand because of the noise, and generalizing from that, she says she doesn't like math.	Its origin lies in generalizing his current situation and saying that he doesn't understand mathematics.	There's noise right now, don't think about anything. It's normal to have difficulty understanding because of the noise. Let's look at it again after the noise stops.	I wanted him to stop thinking that he couldn't do it and to understand that the reason he didn't understand was because of the noise.	It's not disrespectful, it's just a way of expressing her feelings. It's pointless to press the issue and talk about it. During recess, the guidance counselor and I would prefer to listen to her in a room where she can relax.	Mathematics doesn't actually focus on finding x; it offers different perspectives and enables us to think analytically. Football is not just about using your feet, but also your logic, and thanks to mathematics, this way of thinking develops, and you can become a better player.	I believe mathematics helps us realize that we improve ourselves not only through the results but also through the thinking process.	I think that's a positive thing; every child has a different perspective.	I wouldn't say anything directly to Cana. I'd open up virtual manipulatives with colorful diagrams of fractions made of wood.	That's a very nice perspective; since mathematics is an abstract subject, I think expressing it this way is very positive.	I would be pleased that she has a broad perspective and has developed a different solution strategy instead of giving up and forgetting the formula; I would then think about what advice I should give her to help her develop it.	I want him to solve the questions by reasoning, not just using formulas. I can give him a different reasoning test.	Explain how it was done
